# Supplementary material for: N6-Methyladenosine Directly Regulates CD40L Expression in CD4+ T Lymphocytes
Source: MDPI journal article supplement (doi:10.3390/biology12071004), 2023-07-14
Supplement: s1 [file s1]

## Supplemental information

A

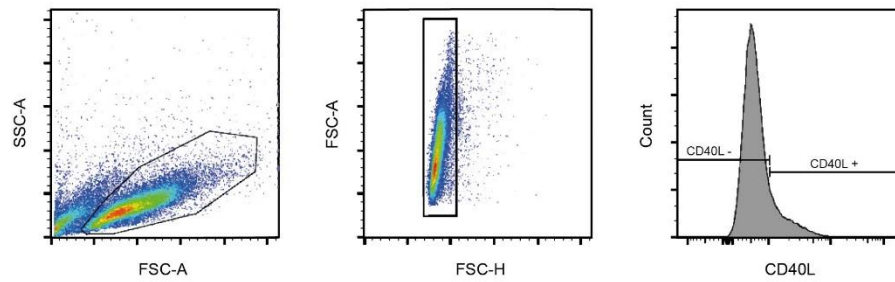

B

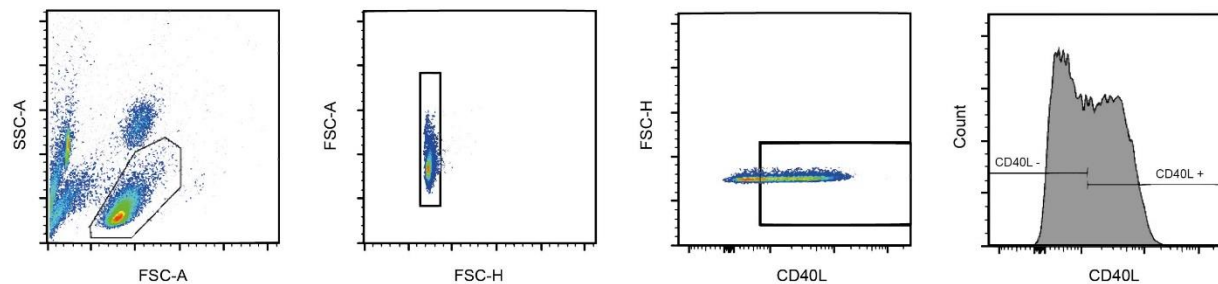

**Figure S1. CD40L expression is regulated via m<sup>6</sup>A ‘eraser’ FTO in activated CD4<sup>+</sup> T lymphocytes. (a)** Jurkat cells with CRISPR-Cas9 knockout of FTO were activated with 4 hours PMA and ionomycin. Flow cytometry gating strategy. **(b)** Human CD4<sup>+</sup> T lymphocytes were pre-incubated for 48 hours with 50μM entacapone. The cells were subsequently activated with CD3/CD28 beads overnight. Flow cytometry gating strategy.

**Table S1 – qPCR primers**

| Target gene | Forward (5' to 3')   | Reverse (5' to 3')      |
|-------------|----------------------|-------------------------|
| CD40L       | ATGGGAAACAGCTGACCGTT | GATTGTTGCCCCGCAAGGTTT   |
| Pre-CD40L   | CCTCCTCTTGTTGATGCCGT | AGGATCTTTCTCCTGTGTTGCAT |
| β2M         | GGCATCTTCAAACCTCCATG | ATGAGTATGCCTGGCCGTGTGA  |
| GUSB        | AGACAAGGGGGCTCCGTA   | CGTTTCTGCTCCATACTCGC    |
| SETD7       | GGGGTTCAGAGACCTGGAAT | GCATGGTGAGAGGATGTGAC    |

**Table S2 – Flow cytometry antibodies**

| Marker                | Fluorochrome | Catalog number | Company                |
|-----------------------|--------------|----------------|------------------------|
| Fixable viability dye | eF506        | 15560607       | Invitrogen eBioscience |
| Mouse anti-CD3        | APC/Cy7      | 2102130        | Sony Biotechnology     |
| Mouse anti-CD4        | PerCP/Cy5.5  | 300530         | Biolegend              |
| Mouse anti-CD40L      | PacB         | 310820         | Biolegend              |

**Table S3 – Western blot antibodies**

| Target gene      | Source | Catalog number | Company                   |
|------------------|--------|----------------|---------------------------|
| FTO              | Rabbit | ab124892       | Abcam                     |
| H3               | Rabbit | 9715S          | Cell Signaling Technology |
| Anti- rabbit HRP | Swine  | P021702-2      | Agilent                   |
| Anti- mouse HRP  | Rabbit | P026002-2      | Agilent                   |
